# Supplementary material
Source: PubMed Central journal article supplement (PMC5996753)
Supplement: NIHMS952813-supplement-Supplemental.pdf [file NIHMS952813-supplement-Supplemental.pdf]

**A**

4-cell stage

8-cell stage

16-cell stage

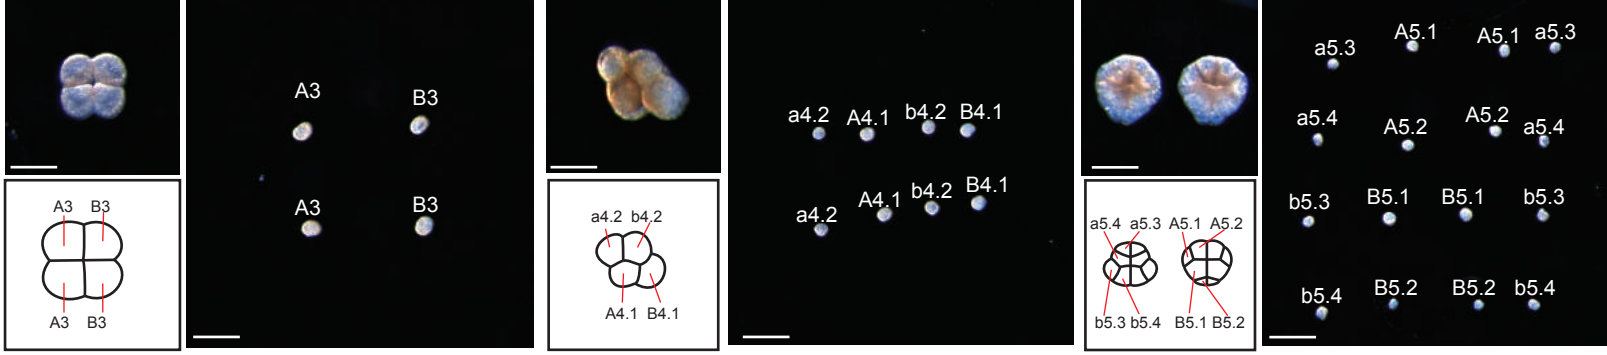**B**

Averaged single-cell gene expression levels

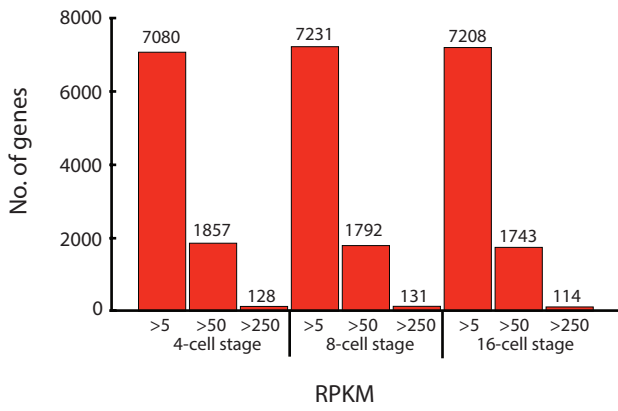**C***Pem* single-cell expression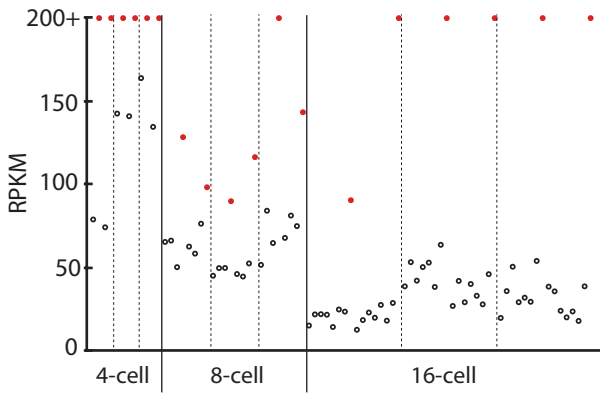*Foxa.a* single-cell expression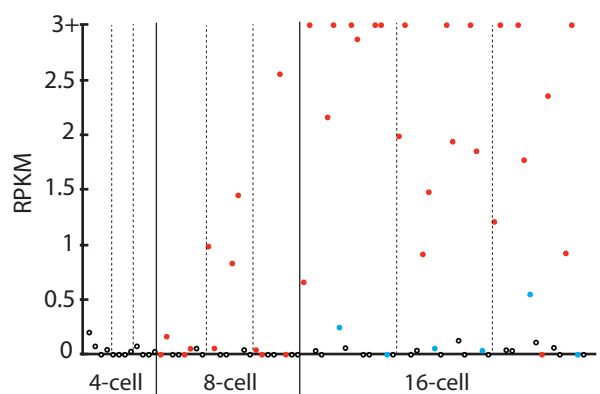**D**

Maternal

Zygotic

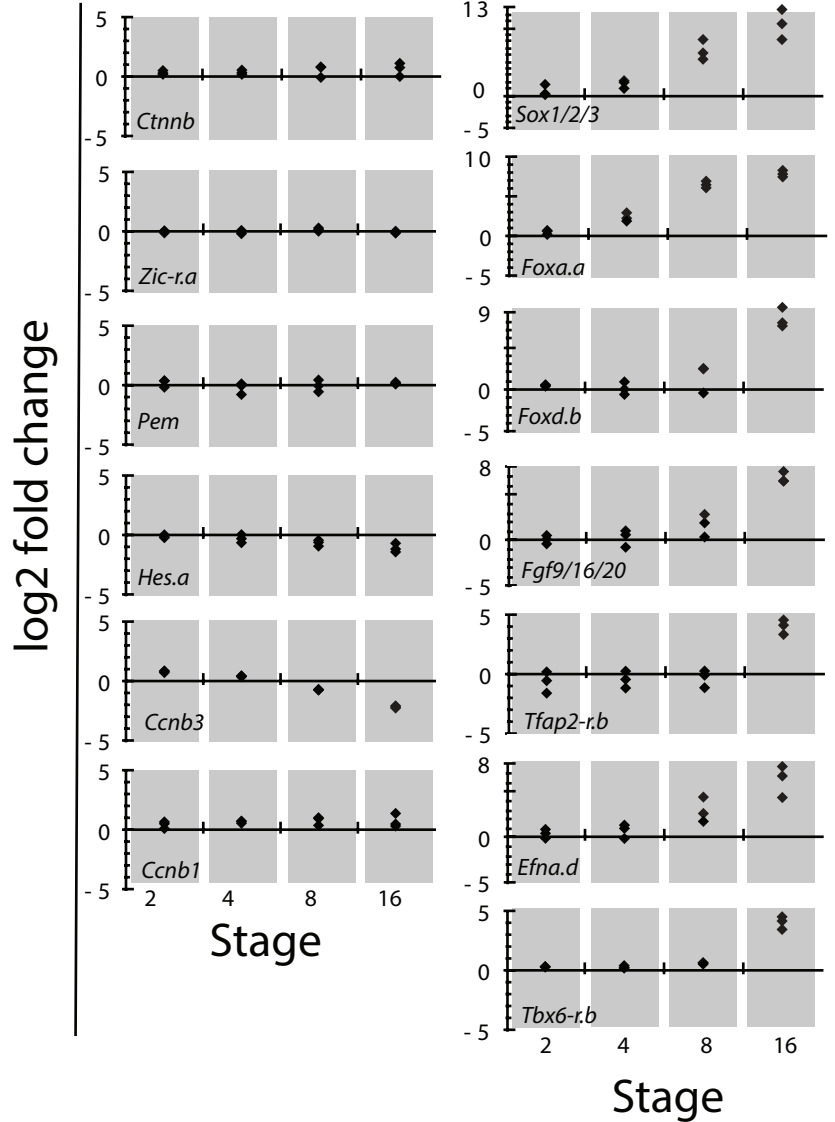

**Figure S1. *Ciona* embryo single dissociation and gene expression. Related to Figure 1.**

(A) Images of intact embryos and embryos that have been dissociated to single-cells at the 4, 8 and 16 cell stages. Each cell is labelled to indicate its identity. 4- and 8-cell intact embryos are oriented anterior left. Two individual 16-cell embryos are oriented anterior up with the embryo on the left showing the animal hemisphere and the embryo on the right showing the vegetal hemisphere. Scale bar = 100  $\mu$ m.

(B) The number of genes that are expressed at or beyond specific RPKM cutoffs averaged over single-cell gene expression levels at the 4-, 8-, and 16-cell stages.

(C) Single-cell expression levels for *Pem* and *Foxa.a*. Cells from individual embryos are separated by dotted lines. Cells that are known to show a positive in situ hybridization signal for the gene is indicated by a solid red dot and cells that are known to not show in situ hybridization signals are indicated by hollow dots. For *Foxa.a*, the B5.1 cells, known to show a weaker in situ hybridization signal, are indicated by solid blue dots. The identities of the cells for each embryo on the graph are (from left to right) 4-cell: A3, B3, A3, B3 8-cell: a4.2, A4.1, b4.2, B4.1, a4.2, A4.1, b4.2, B4.1 and 16-cell: a5.3, a5.4, b5.3, b5.4, A5.1, A5.2, B5.1, B5.2, a5.3, a5.4, b5.3, b5.4, A5.1, A5.2, B5.1, B5.2.

(D) Expression levels of genes from the 2- to 16-cell stages relative to the expression level at the early 1-cell stage determined by qPCR. Individual diamonds denote a single measurement from pooled total RNA purified from eggs collected from a single adult.

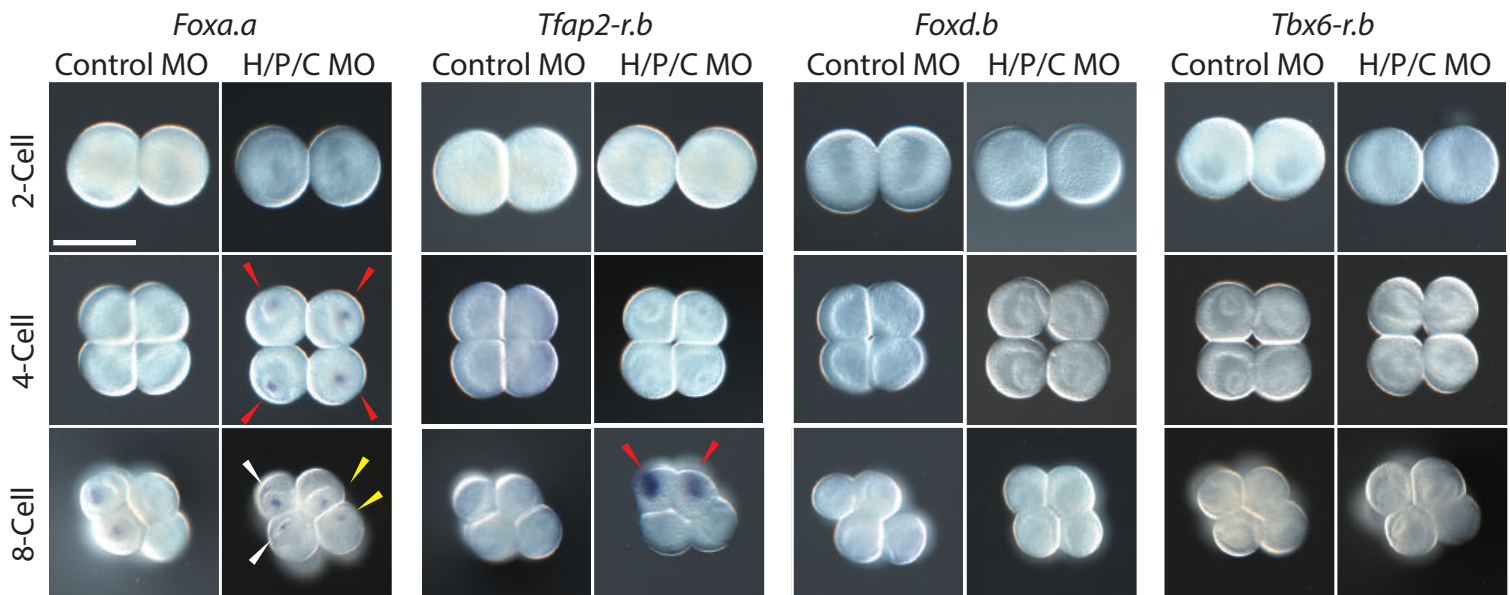

**Figure S2. *Hes.a*, *Pem* and *Ccnb3* triple knockdowns. Related to Figure 2.**

*In situ* hybridizations of *Foxa.a*, *Tfap2-r.b*, *Foxd.b* and *Tbx6-r.b* in early *Ciona* embryos simultaneously injected with MOs targeting *Hes.a*, *Pem* and *Ccnb3* (H/P/C). Expression in cells matching controls are indicated with a white arrowhead. The expansion of expression into additional cells is indicated with a yellow arrowhead. Precocious expression is indicated with a red arrowhead. 4- and 8- cell stage embryos are orientated anterior left. Scale bar = 50  $\mu$ m.

**A**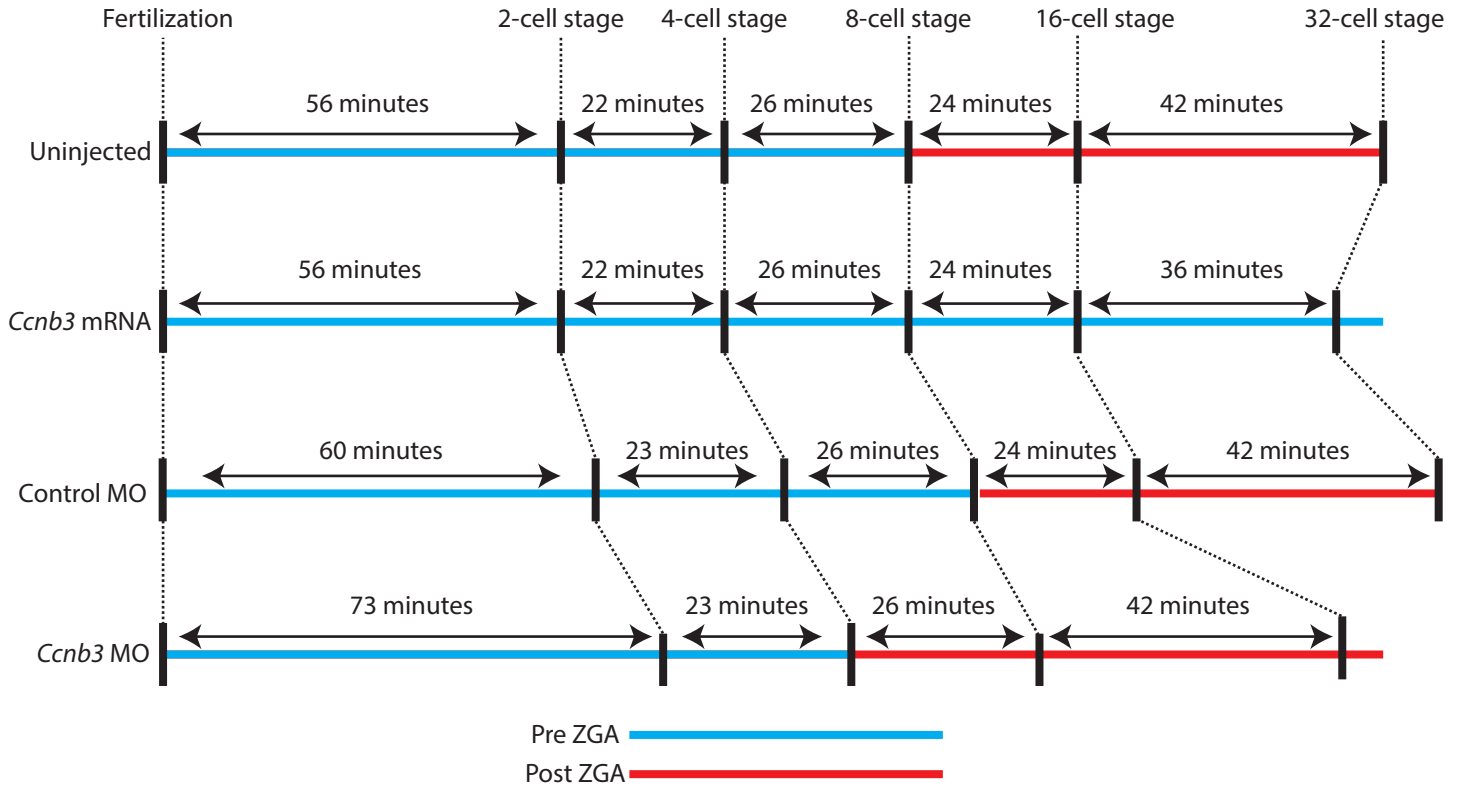**B**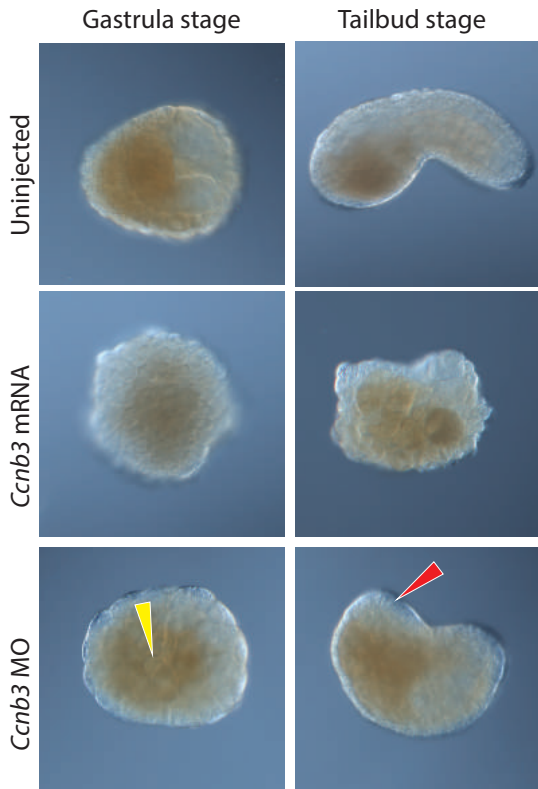**C**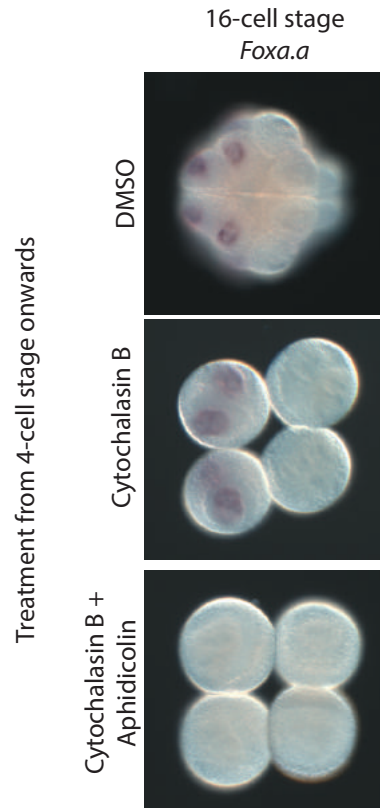

**Figure S3. *Ccnb3* is essential for ZGA during early *Ciona* development. Related to Figures 2-3.**

**(A)** A depiction of the cell cycle lengths for the first 170 minutes of development for normal *Ciona* embryos and in embryos where *Ccnb3* was perturbed. The start of each stage developmental stage is considered to be the point when cleavage is completed.

**(B)** Effects of *Ccnb3* perturbation at later gastrula and tailbud stages. All morphogenetic processes have failed in *Ccnb3* mRNA overexpressions. In *Ccnb3* MO knockdowns gastrulation succeeded but neurulation failed. The yellow arrowhead indicates the position of the blastopore. The red arrowhead indicates the unfused neural folds. Embryos are oriented anterior left except for *Ccnb3* mRNA injections where the embryos could not be oriented to any axis. Scale bar = 100  $\mu\text{m}$ .

**(C)** *Foxa.a* expression in *Ciona* embryos treated from the 4-cell stage onwards with cytochalasin B by itself or in combination with aphidicolin. The embryos are oriented anterior left.

**A**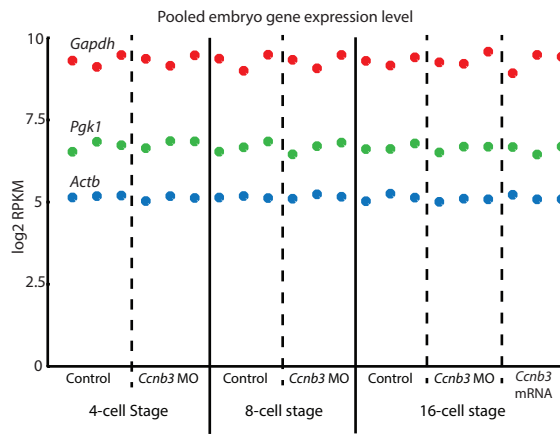**B**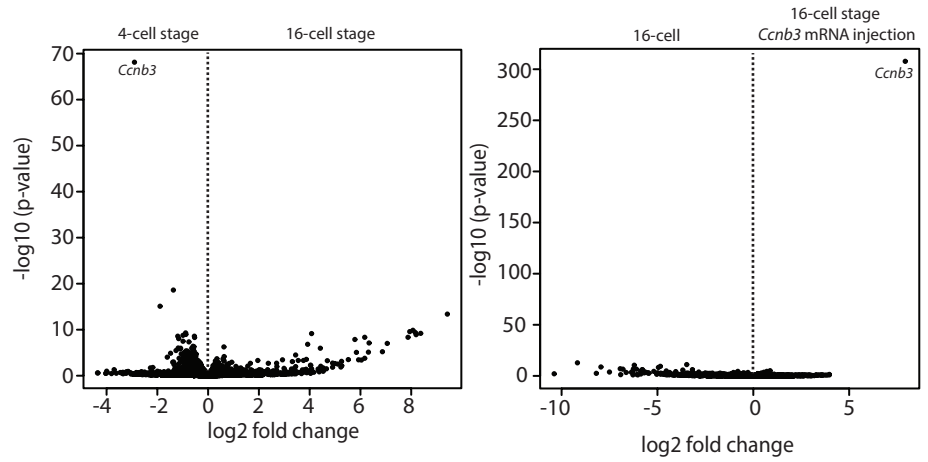**C**

### Transcription factors

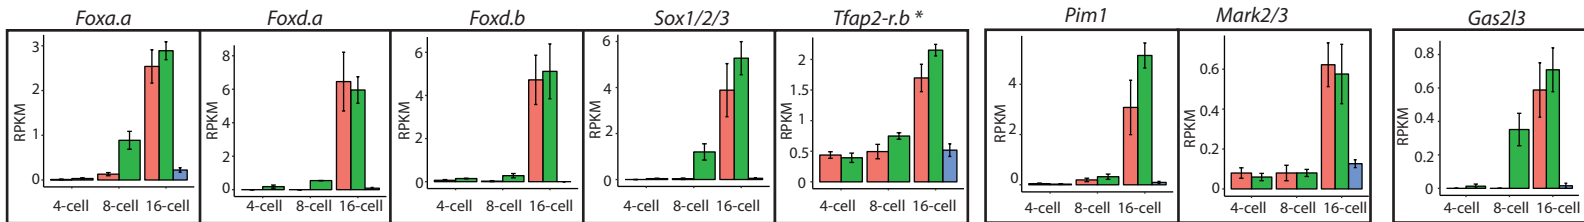

### Signaling molecules

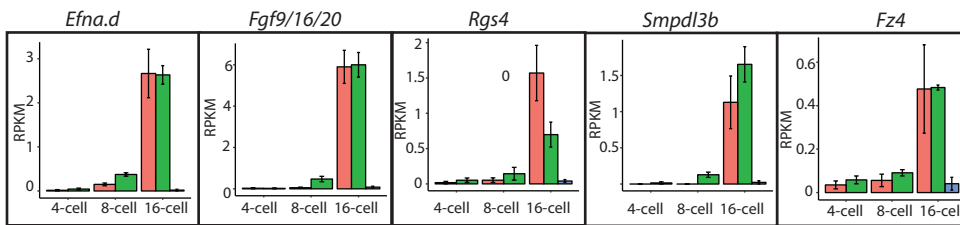

### Unknown genes with identifiable protein domains

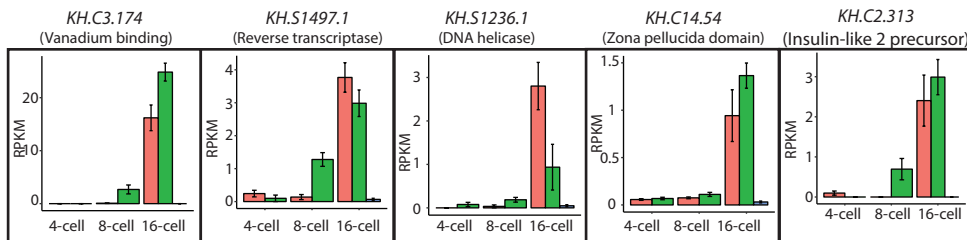

### Unknown genes without identifiable protein domains

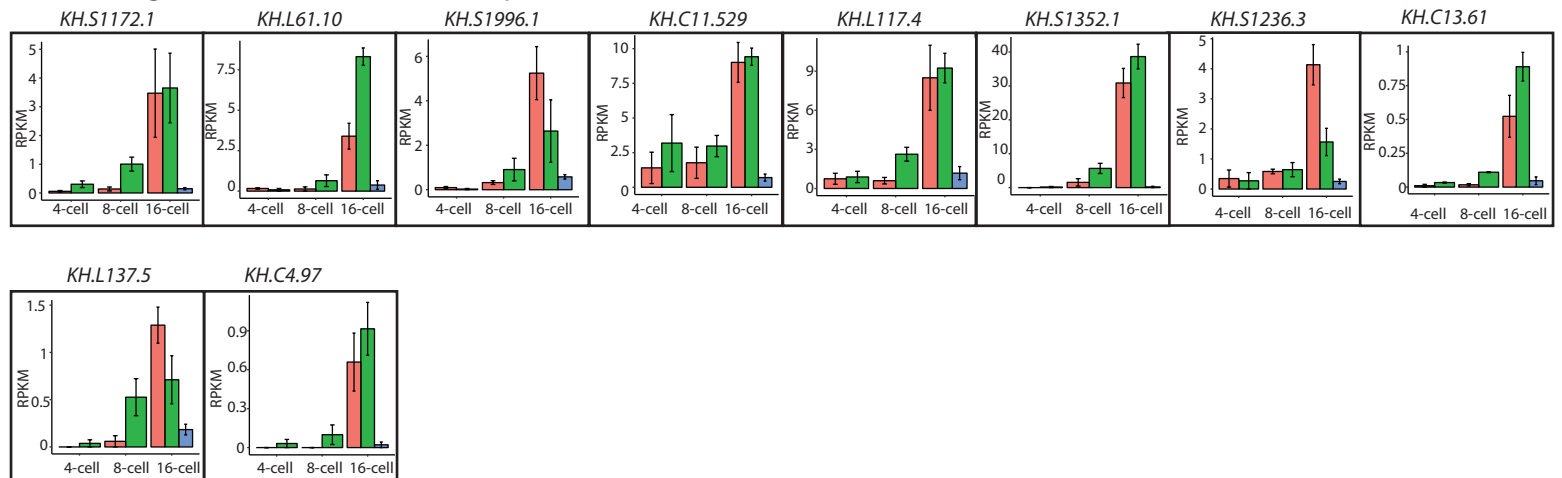

**Figure S4. Pooled embryo RNA-seq analysis of *Ccnb3* perturbations of zygotic genes in *Ciona*. Related to Figure 4.**

**(A)** Pooled embryo expression levels of *Gapdh*, *Pgk1* and *Actb* from the 4 to 16-cell stages.

**(B)** Volcano plot depicting the same data as in Figure 4 of the main text but with *Ccnb3* included.

**(C)** Expression levels of genes identified as significantly affected by *Ccbn3* perturbation at the 16-cell stage or upregulated from the 4- to 16-cell stage in normal *Ciona* development based on differential expression analysis. Each stage and experimental condition was performed in biological triplicate (n=3) with embryos from different parent animals. *Tfap2-r.b* was not identified by the analysis but is indicated for reference. Genes are grouped based on their known or predicted functions. Error bars indicate  $\pm$  the standard error of the mean.

| Species           | Gene                        | Method                                   | Reference |
|-------------------|-----------------------------|------------------------------------------|-----------|
| Human             | <i>Ccnb3</i>                | Single cell RNA-seq                      | [S1]      |
| Mouse             | <i>Ccnb3</i>                | Single cell RNA-seq                      | [S2]      |
| <i>Xenopus</i>    | <i>Ccnb1</i> , <i>Ccnb2</i> | Developmentally staged RNA-seq           | [S3]      |
| <i>Sea urchin</i> | <i>CycB</i> , <i>CycB3</i>  | Developmentally staged RNA-seq           | [S4]      |
| <i>Drosophila</i> | <i>CycB</i>                 | Fluorescent <i>in situ</i> hybridization | [S5]      |
| <i>C. elegans</i> | <i>Cyb-2.1</i>              | Single cell RNA-seq                      | [S6]      |

**Table S1. List of organisms that display diminishing levels of Cyclin B genes correlating with the onset of zygotic transcription. Related to Figure 4.**

| Gene names        | Synonyms            | KH gene model (2012) | MO                        | MO reference | qPCR Primer 1            | qPCR Primer 2          | qPCR reference | ISH clone |
|-------------------|---------------------|----------------------|---------------------------|--------------|--------------------------|------------------------|----------------|-----------|
| <i>Foxa.a</i>     | <i>FoxA</i>         | KH.C11.313           |                           |              | CACCATCAGTGAATGACACTA    | GAGACGGAGTGGACACTGA    | [S8]           | GC13a23   |
| <i>Sox1/2/3</i>   | <i>SoxB1</i>        | KH.C1.99             |                           |              | AGCAGAGAGTGAACGACCA      | CCGTTTCGCTTCGTCGATAA   | this study     |           |
| <i>Foxd.b</i>     | <i>FoxD-b</i>       | KH.C8.396            |                           |              | GCCTGTGTTGGCAGAACTTA     | GGTTTCACAGTCGCCACTT    | [S8]           | GC29n08   |
| <i>Fgf9/16/20</i> | <i>Fgf9</i>         | KH.C2.125            |                           |              | CTTCCGACAAGGAAGCTAT      | GCGTTCGTCGTGTGAAA      | [S8]           |           |
| <i>Tfap2-r.b</i>  | <i>AP2</i>          | KH.C7.43             |                           |              | CCAACGACCTCTACACATTTTCAG | GATAACGCAGCATCCGTTAAGT | this study     | GC25n01   |
| <i>Ejna.d</i>     | <i>EphA</i>         | KH.C3.716            |                           |              | CGTTGCTGGTCATGCTTACA     | AGGTCACTCTGACTCATGCC   | this study     |           |
| <i>Tbx6-r.b</i>   | <i>Tbx6b</i>        | KH.S654.3            |                           |              | AACGACCACATCTCCGTTTTTA   | AGTGCCGCATGCAGTAGTAA   | [S8]           | GC09i19   |
| <i>Ctnnb</i>      | <i>Beta catenin</i> | KH.C9.53             |                           |              | AGCTCCGTCAGTTCAGTTCA     | AAAGTCCATGGGTTGTGGC    | this study     |           |
| <i>Zic-r.a</i>    | <i>Macho1</i>       | KH.C1.727            |                           |              | CTGCATTGTCGCATCAGCA      | AGCGTCTGCGTTCGTCGATA   | this study     |           |
| <i>Pem</i>        | <i>PEM</i>          | KH.C1.755            | ATACTGTGCATGTTTACATTCATAT | [S7]         | TTCTCCGGCACTGGAATCT      | TGAGGTGTTGAGGTAACGCT   | this study     |           |
| <i>Ccnb3</i>      | <i>Cyclin B3</i>    | KH.L139.17           | ACGAGGCATATTTATAGGCAGCTAT | this study   | TTTATCGCCGTAGCCGCACT     | ACGGGAACCTTACCAGTGCGA  | this study     |           |
| <i>Hes.a</i>      | <i>HesA</i>         | KH.C1.159            | TTCTCGTTCAACAGGCATGATTGT  | [S8]         | ACCCTAACGTTCCCAACCAACC   | CCGATGACGTAGGTGAGGGT   | this study     |           |
| <i>Ccnb1</i>      | <i>Cyclin B1</i>    | KH.C4.213            |                           |              | AAACCACAACCTGTGTCGG      | GTGGTGAACCTGGACCAACC   | this study     |           |
| <i>Gapdh</i>      | <i>GAPDH</i>        | KH.C11.121           |                           |              |                          |                        |                |           |
| <i>Pgk1</i>       | <i>PGK1</i>         | KH.C14.296           |                           |              |                          |                        |                |           |
| <i>Actb</i>       | <i>Beta actin</i>   | KH.C13.70            |                           |              |                          |                        |                |           |
|                   |                     | KH.C3.174            |                           |              |                          |                        |                |           |
| <i>Foxd.a</i>     | <i>FoxD-a</i>       | KH.C8.890            |                           |              |                          |                        |                |           |
| <i>Smpd13b</i>    | <i>Asm3a</i>        | KH.C8.685            |                           |              |                          |                        |                |           |
| <i>Rgs4</i>       |                     | KH.C11.577           |                           |              |                          |                        |                |           |
| <i>Till1</i>      |                     | KH.C8.745            |                           |              |                          |                        |                |           |
| <i>Pim1</i>       |                     | KH.C14.414           |                           |              |                          |                        |                |           |
|                   |                     | KH.C2.313            |                           |              |                          |                        |                |           |
|                   |                     | KH.S1497.1           |                           |              |                          |                        |                |           |
|                   |                     | KH.L61.10            |                           |              |                          |                        |                |           |
|                   |                     | KH.C8.299            |                           |              |                          |                        |                |           |
|                   |                     | KH.S1172.1           |                           |              |                          |                        |                |           |
|                   |                     | KH.S1236.1           |                           |              |                          |                        |                |           |
|                   |                     | KH.L117.4            |                           |              |                          |                        |                |           |
|                   |                     | KH.S1352.1           |                           |              |                          |                        |                |           |
|                   |                     | KH.S1996.1           |                           |              |                          |                        |                |           |
|                   |                     | KH.C11.529           |                           |              |                          |                        |                |           |
|                   |                     | KH.C14.54            |                           |              |                          |                        |                |           |
| <i>Mark2/3</i>    |                     | KH.C11.697           |                           |              |                          |                        |                |           |
|                   |                     | KH.C4.97             |                           |              |                          |                        |                |           |
|                   |                     | KH.L137.5            |                           |              |                          |                        |                |           |
|                   |                     | KH.C13.61            |                           |              |                          |                        |                |           |
| <i>Fz4</i>        |                     | KH.C6.162            |                           |              |                          |                        |                |           |
| <i>Gas2l3</i>     |                     | KH.L152.12           |                           |              |                          |                        |                |           |

**Table S2. List of gene names and reagents use. Related to STAR Methods.**

## SUPPLEMENTAL REFERENCES

- S1. Yan, L., Yang, M., Guo, H., Yang, L., Wu, J., Li, R., Liu, P., Lian, Y., Zheng, X., Yan, J. et al., (2013). Single-cell RNA-Seq profiling of human preimplantation embryos and embryonic stem cells. *Nat. Struct. Mol. Biol.* 20, 1131-1139.
- S2. Deng, Q., Ramskold, D., Reinius, B. and Sandberg, R. (2014). Single-cell RNA-seq reveals dynamic, random monoallelic gene expression in mammalian cells. *Science* 343, 193-196.
- S3. Peshkin, L., Wuhr, M., Pearl, E., Haas, W., Freeman, R.M.Jr., Gerhart, J.C., Klein, A.M., Horb, M., Gygi, S.P. and Kirschner, M.W. (2015). On the Relationship of Protein and mRNA Dynamics in Vertebrate Embryonic Development. *Dev. Cell* 35, (383-394).
- S4. Tu, Q., Cameron, R. A., Worley, K. C., Gibbs, R. A. and Davidson, E. H. (2014). Quantitative developmental transcriptomes of the sea urchin *Strongylocentrotus purpuratus*. *Dev. Biol.* 385, 160-167.
- S5. Benoit, B., He, C.H., Zhang, F. Votruba, S.M., Tadros, W., Westwood, J.T., Simbert, C.A., Lipshitz, H.D. and Theurkauf, W.E. (2009). An essential role for the RNA-binding protein Smaug during the *Drosophila* maternal-to-zygotic transition. *Development* 136, 923-932.
- S6. Tintori, S.C., Osborne Nishimura, E., Golden, P., Lieb, J. D. and Goldstein, B. A (2016). Transcriptional lineage of the early *C. elegans* embryo. *Dev. Cell* 38, 430-444.
- S7. Shirae-Kurabayashi, M., Matsuda, K. and Nakamura, A. (2011). Ci-Pem-1 localizes to the nucleus and represses somatic transcription in the germline of *Ciona intestinalis* embryos. *Development* 138, 2871-2881.
- S8. Imai, K. S., Levine, M., Satoh, N. and Satou, Y. (2006). Regulatory blueprint for a chordate embryo. *Science* 312, 1183-1187.
